# Supplementary material for: Native SAD is maturing
Source: PubMed Central journal article supplement (PMC4491315; doi:10.1107/s2052252515008337), 2015-05-14
Supplement: m-02-00431-sup1.pdf [file m-02-00431-sup1.pdf]

# IUCrJ

Volume 2 (2015)

Supporting information for article:

Native SAD is maturing

John P. Rose, Bi-Cheng Wang and Manfred S. Weiss

**Table S1** A listing of Native-SAD structures by year

| Year | Molecule                  | Uniprot ID | PDB ID | <sup>1</sup> MWT (SEQRES) | <sup>2</sup> NCS | Source      | $\lambda$ (Å) | <sup>3</sup> Anomalous Scatters (ASU) | <sup>4</sup> Bijvoet Ratio | <sup>5</sup> Reference         |
|------|---------------------------|------------|--------|---------------------------|------------------|-------------|---------------|---------------------------------------|----------------------------|--------------------------------|
| 1981 | Crambin                   | P01542     | 1CRN   | 4.736                     | 1                | Cu Ka       | 1.5418        | 6 S                                   | 1.51                       | DOI: 10.1038/290107a0          |
| 1999 | Lysozyme                  | P00698     | 1LZ8   | 14.313                    | 1                | NSLS X9B    | 1.5400        | 10 S, 8 Cl, 1 Na                      | 2.40                       | DOI: 10.1006/jmbi.1999.2743    |
| 2000 | Obelin                    | Q27709     | 1EL4   | 22.225                    | 1                | APS 17ID    | 1.7400        | 8 S, 1 Cl                             | 1.21                       | DOI: 10.1110/ps.9.11.2085      |
| 2001 | IGF2R Domain 11           | P11717     | 1GP0   | 15.547                    | 1                | ESRF BM14   | 1.7700        | 11 S                                  | 1.44                       | DOI: 10.1093/emboj/21.5.1054   |
| 2001 | DNA 5-mer                 |            | 1ICK   | 1.872                     | 2                | NSLS X8C    | 1.5400        | 10 P, 1 Mg                            | 1.88                       | DOI: 10.1107/S0907444901006382 |
| 2001 | $\alpha$ -crustacyanin C1 | P80029     | 1I4U   | 20.668                    | 2                | ESRF BM14   | 1.7700        | 14 S                                  | 1.00                       | DOI: 10.1107/S0907444901009362 |
| 2001 | Apocrustacyanin A1        | P80029     | 1H91   | 20.537                    | 2                | SRS 9.5     | 2.0450        | 12 S                                  | 1.19                       | DOI:10.1107/S0907444901009350  |
| 2002 | F53F4.3 CAP-Gly           | Q20728     | 1LPL   | 10.345                    | 1                | APS 17ID    | 1.7400        | 4 S                                   | 0.99                       | DOI: 10.1074/jbc.M208512200    |
| 2002 | Tryparedoxin form I       | O77093     | 1O6J   | 16.909                    | 2                | ESRF ID14-2 | 1.7700        | 14 S                                  | 1.10                       | DOI: 10.1107/S0907444901016808 |
| 2002 | Tryparedoxin form II      | O77093     | 1O81   | 17.143                    | 2                | ESRF BM14   | 1.7700        | 29 S                                  | 1.57                       | DOI: 10.1107/S0907444901016808 |
| 2002 | LB trypsin inhibitor      | P01056     | 1H34   | 9.097                     | 1                | Cu Ka       | 1.5418        | 14 S                                  | 1.66                       | DOI: 10.1107/S0907444902020917 |
| 2002 | PA Lectin-1               | Q05097     | 1L7L   | 12.762                    | 1                | APS 17ID    | 1.5400        | 3 S, 1 Ca                             | 1.48                       | DOI: 10.2210/pdb1l7l/pdb       |
| 2003 | Sso10a                    | Q92838     | 1R7J   | 11.083                    | 1                | Cr Ka       | 2.2900        | 8 S                                   | 2.31                       | DOI: 10.1016/j.jmb.2004.05.044 |
| 2003 | PRRSV                     | Q9YJ11     | 1P65   | 8.157                     | 2                | DESY BW7A   | 1.7400        | 8S                                    | 1.11                       | DOI: 10.1016/j.str.2003.09.018 |
| 2003 | Viscotoxin A3             | P01538     | 1OKH   | 4.835                     | 2                | Cu Ka       | 1.5418        | 13 S, 2 P                             | 2.02                       | DOI: 10.1107/S0907444903018973 |
| 2003 | Bubble protein            | P83799     | 1UOY   | 6.570                     | 1                | Cu Ka       | 1.5418        | 8 S                                   | 1.48                       | DOI: 10.1107/S0907444903025927 |
| 2003 | PA1204                    | Q9I4D4     | 1RTT   | 21.094                    | 1                | NSLS X12C   | 1.7000        | 4 S                                   | 0.69                       | DOI: 10.1107/S0907444906001600 |
| 2003 | PF1951                    | Q8TZN6     | 1NNH   | 33.991                    | 1                | Cr Ka       | 2.2900        | 8 S, 1 Na                             | 1.43                       | DOI: 10.2210/pdb1nnh/pdb       |
| 2004 | GGACT                     | Q923B0     | 1VKB   | 18.534                    | 1                | ALS 8.3.1   | 1.7400        | 8 S                                   | 1.04                       | DOI: 10.1002/prot.20610        |
| 2004 | Coprogen oxidase          | P11353     | 1TK1   | 29.894                    | 1                | Cr Ka       | 2.2900        | 8 S                                   | 1.41                       | DOI: 10.1074/jbc.M406050200    |
| 2004 | svPLA2 homolog            | P49121     | 1S8I   | 14.023                    | 1                | Cu Ka       | 1.5418        | 17 S                                  | 1.47                       | DOI: 10.1074/jbc.M410588200    |
| 2004 | CIB                       | Q99828     | 1XO5   | 41.804                    | 2                | Cr Ka       | 2.2900        | 8 S, 8 Ca                             | 2.70                       | DOI: 10.1074/jbc.M411515200    |
| 2004 | AF2228                    | O28055     | 1SAU   | 13.477                    | 1                | ELETTRA     | 1.9000        | 5 S                                   | 1.19                       | DOI: 10.1107/S0907444904003002 |
| 2004 | Phospholipase A2          | P00593     | 1VKQ   | 13.804                    | 1                | NSLS X9A    | 1.5400        | 18 S, 1 Ca, 1 Cl                      | 2.75                       | DOI: 10.1107/S090744490401697X |
| 2004 | Aequorin 1                | P07164     | 1SL8   | 21.861                    | 1                | Cr Ka       | 2.2900        | 8 S, 3 Ca                             | 3.87                       | DOI: 10.1110/ps.041142905      |
| 2004 | VC2159                    | Q9KQ45     | 1U8S   | 21.366                    | 2                | NSLS X12C   | 1.7000        | 20 S                                  | 1.08                       | DOI: 10.2210/pdb1u8s/pdb       |
| 2004 | Q15691                    | Q15691     | 1VKA   | 17.370                    | 2                | Cr Ka       | 2.2900        | 24 S                                  | 1.60                       | DOI: 10.2210/pdb1vka/pdb       |
| 2004 | GTP BP                    | Q5SM23     | 1WF3   | 33.809                    | 2                | Cr Ka       | 2.2909        | 12 S, 3 P, 1 Mg                       | 1.71                       | DOI: 10.2210/pdb1wf3/pdb       |
| 2004 | YkuL                      | O31698     | 1YAV   | 17.988                    | 2                | NSLS X12C   | 1.7000        | 15 S                                  | 1.02                       | DOI:10.2210/pdb1yav/pdb        |
| 2005 | FKBP35                    | Q8I4V8     | 2FBN   | 22.997                    | 2                | Cr Ka       | 2.2900        | 8 S                                   | 1.14                       | DOI: 10.1002/pro.226           |

| Year | Molecule      | Uniprot ID | PDB ID | <sup>1</sup> MWT (SEQRES) | <sup>2</sup> NCS | Source      | $\lambda$ (Å) | <sup>3</sup> Anomalous Scatters (ASU) | <sup>4</sup> Bijvoet Ratio | <sup>5</sup> Reference             |
|------|---------------|------------|--------|---------------------------|------------------|-------------|---------------|---------------------------------------|----------------------------|------------------------------------|
| 2005 | Mud-1         | Q10256     | 1Z96   | 4.059                     | 2                | ESRF BM14   | 1.7710        | 4 S                                   | 1.20                       | DOI: 10.1038/sj.emboj.7600797      |
| 2005 | SusB          | G8JZS4     | 2D73   | 84.309                    | 2                | Cr Ka       | 2.2900        | 56 S, 2 Ca                            | 2.22                       | DOI: 10.1074/jbc.M806115200        |
| 2005 | ToxA          | P78737     | 1ZLD   | 13.213                    | 1                | Cu Ka       | 1.5418        | 4 S                                   | 0.74                       | DOI: 10.1105/tpc.105.034918        |
| 2005 | FGE protein   | Q8NBK3     | 1Z70   | 34.863                    | 1                | Cu Ka       | 1.5418        | 12 S, 2 Ca, 1 Cl                      | 1.81                       | DOI: 10.1107/S0907444905013831     |
| 2005 | AF1432        | O28840     | 1YNB   | 18.066                    | 1                | Cr Ka       | 2.2900        | 6 S                                   | 1.57                       | DOI: 10.2210/pdb1ynb/pdb           |
| 2005 | PA1835        | Q912R0     | 1YOC   | 16.012                    | 2                | Cr Ka       | 2.2900        | 18 S                                  | 2.04                       | DOI: 10.2210/pdb1yoc/pdb           |
| 2005 | AF0625        | O29630     | 1YQE   | 31.927                    | 1                | Cr Ka       | 2.2900        | 7 S, 2 P                              | 1.81                       | DOI: 10.2210/pdb1yqe/pdb           |
| 2005 | PF0523        | Q8U3E5     | 1ZD0   | 16.823                    | 1                | Cr Ka       | 2.2900        | 3 S, 1 Mg                             | 1.37                       | DOI: 10.2210/pdb1zd0/pdb           |
| 2005 | PA1268        | Q91476     | 2AZP   | 33.866                    | 1                | Cr Ka       | 2.2900        | 10 S                                  | 1.48                       | DOI: 10.2210/pdb2azp/pdb           |
| 2005 | PHS023        | O73983     | 2CVI   | 9.667                     | 2                | Cr Ka       | 2.2900        | 28 S, 2 K                             | 4.89                       | DOI: 10.2210/pdb2cvi/pdb           |
| 2005 | TTHA1634      | Q5SHU6     | 2D5W   | 68.624                    | 2                | Cr Ka       | 2.2900        | 44 S                                  | 1.54                       | DOI: 10.2210/pdb2d5w/pdb           |
| 2006 | Proteinase K  | P06873     | 2ID8   | 28.934                    | 1                | APS 22 ID   | 0.9800        | 10 S, 1 Ca, 1 Cl                      | 0.67                       | 10.1107/S0907444906038534          |
| 2006 | DIPP-1        | O95989     | 2FVV   | 22.023                    | 1                | Cu Ka       | 1.5418        | 5 S, 6 P, 1 Cl                        | 1.47                       | DOI: 10.1002/prot.22489            |
| 2006 | DUSP9         | Q99956     | 2HXP   | 17.656                    | 1                | NLSL X12C   | 1.7000        | 3 S, 1 P                              | 0.95                       | DOI: 10.1007/s10969-007-9036-1     |
| 2006 | Majastridin   | P05449     | 2NXV   | 28.808                    | 2                | MAXLAB I911 | 1.8000        | 24 S                                  | 1.13                       | DOI: 10.1016/j.bbapap.2007.11.005  |
| 2006 | SCO7518       | Q93J02     | 2DG8   | 21.941                    | 4                | Cr Ka       | 2.2900        | 8 S                                   | 0.82                       | DOI: 10.1016/j.febslet.2014.09.037 |
| 2006 | Fibronectin   | P02751     | 2CG6   | 10.106                    | 1                | ESRF BM14   | 1.7700        | 11 S                                  | 1.79                       | DOI: 10.1016/j.jmb.2007.02.061     |
| 2006 | CBP1          | C9V488     | 2HQ8   | 20.829                    | 2                | APS 22ID    | 1.7000        | 14 S, 6 Ca                            | 2.29                       | DOI: 10.1039/b716535h              |
| 2006 | A2R (VEGF-E)  | P52584     | 2GNN   | 14.249                    | 4                | SLS X06SA   | 1.7000        | 46 S, 3 Cl                            | 1.88                       | DOI: 10.1074/jbc.M601842200        |
| 2006 | Lam16A        | Q874E3     | 2CL2   | 31.900                    | 1                | ESRF ID14-4 | 1.7800        | 13 S                                  | 1.09                       | DOI: 10.1107/S0907444906036407     |
| 2006 | NBR1 PB1      | Q14596     | 2G4S   | 9.807                     | 1                | DESY X12    | 2.0000        | 4 S, 1 Cl                             | 2.21                       | DOI: 10.1107/S0907444906055624     |
| 2006 | hARH3         | Q9NX46     | 2G4K   | 37.731                    | 1                | DESY X12    | 2.0000        | 15 S, 2 Cl, 2 Mg                      | 2.12                       | DOI: 10.1107/S0907444906055624     |
| 2006 | HNL           | P52704     | 2G4L   | 29.227                    | 1                | DESY X12    | 2.0000        | 13 S, 1 Cl                            | 1.92                       | DOI: 10.1107/S0907444906055624     |
| 2006 | Insulin       | P01315     | 2G4M   | 5.765                     | 1                | DESY X12    | 2.0000        | 6 S                                   | 2.18                       | DOI: 10.1107/S0907444906055624     |
| 2006 | LeuB          | P9WKK9     | 2G4O   | 35.393                    | 4                | DESY X12    | 2.0000        | 26 S, 6 Cl                            | 1.46                       | DOI: 10.1107/S0907444906055624     |
| 2006 | MogA          | O53877     | 2G4R   | 16.188                    | 3                | DESY X12    | 2.0000        | 6 S, 1 Cl                             | 1.13                       | DOI: 10.1107/S0907444906055624     |
| 2006 | PPE           | P00772     | 2G4T   | 25.908                    | 1                | DESY X12    | 2.0000        | 12 S, 1 Na                            | 1.55                       | DOI: 10.1107/S0907444906055624     |
| 2006 | RNAse A       | P61823     | 2G4W   | 13.690                    | 2                | DESY X12    | 2.0000        | 25 S, 1 Cl                            | 2.55                       | DOI: 10.1107/S0907444906055624     |
| 2006 | Thaumatococin | Q8RVT0     | 2G4Y   | 22.219                    | 1                | DESY X12    | 2.0000        | 17 S                                  | 1.87                       | DOI: 10.1107/S0907444906055624     |
| 2006 | Trypsin P1    | P35049     | 2G51   | 22.186                    | 1                | DESY X12    | 2.0000        | 7 S, 3 Cl                             | 2.18                       | DOI: 10.1107/S0907444906055624     |
| 2006 | Titin         | Q8WZ42     | 2ILL   | 21.607                    | 1                | DESY X12    | 2.0000        | 4 S, 2Cl                              | 1.73                       | DOI: 10.1107/S0907444906055624     |
| 2006 | ATU299        | A9CI22     | 2HLY   | 22.748                    | 1                | Cr Ka       | 2.2900        | 10 S                                  | 1.81                       | DOI: 10.2210/pdb2hly/pdb           |
| 2006 | RSP_3884      | Q3HKK5     | 2HZG   | 42.457                    | 2                | NLSL X12C   | 1.7400        | 52 S                                  | 1.24                       | DOI: 10.2210/pdb2hgz/pdb           |
| 2006 | PTO0218       | Q6L2J9     | 2I52   | 13.760                    | 6                | NLSL X4A    | 1.7430        | 30 S, 12 Ca, 1 Cl                     | 2.68                       | DOI: 10.2210/pdb2i52/pdb           |
| 2007 | TP0655        | O83661     | 2V84   | 39.090                    | 1                | Cu Ka       | 1.5418        | 12 S, 5 Cl                            | 1.28                       | DOI: 10.1016/j.jmb.2007.08.018     |

| Year | Molecule           | Uniprot ID | PDB ID | <sup>1</sup> MWT (SEQRES) | <sup>2</sup> NCS | Source          | $\lambda$ (Å) | <sup>3</sup> Anomalous Scatters (ASU) | <sup>4</sup> Bijvoet Ratio | <sup>5</sup> Reference            |
|------|--------------------|------------|--------|---------------------------|------------------|-----------------|---------------|---------------------------------------|----------------------------|-----------------------------------|
| 2007 | GITRL              | Q7TS55     | 2QDN   | 14.993                    | 2                | NSLS X4A        | 1.7432        | 12 S                                  | 1.06                       | DOI: 10.1073/pnas.0710529105      |
| 2007 | ASP1               | Q8WRW5     | 3BJH   | 13.186                    | 1                | ESRF BM14       | 1.7700        | 11 S                                  | 1.56                       | DOI: 10.1074/jbc.M311212200       |
| 2007 | CD5 domain III     | P06127     | 2JA4   | 11.301                    | 1                | SLS X06SA       | 1.8000        | 8 S                                   | 1.48                       | DOI: 10.1074/jbc.M611699200       |
| 2007 | R-PTP-N            | Q16849     | 2QT7   | 9.829                     | 2                | NSLS X6A        | 1.5895        | 2 S, 3 Ca                             | 1.71                       | DOI: 10.1074/jbc.M708144200       |
| 2007 | phoP               | P23836     | 2E6U   | 16.721                    | 1                | Cr Ka           | 2.2900        | 8 S, 3 P, 1 Ca, 3 Cl                  | 5.70                       | DOI: 10.1107/S0907444905012734    |
| 2007 | SCO0332            | Q9RK47     | 2ZB9   | 23.596                    | 2                | Cr Ka           | 2.2909        | 4 S                                   | 0.79                       | DOI: 10.1107/S0907444907059835    |
| 2007 | SCO5068            | Q9ADD9     | 2REK   | 41.696                    | 2                | Cr Ka           | 2.2900        | 6 S                                   | 0.52                       | DOI: 10.2210/pdb2rek/pdb          |
| 2007 | PH1780             | O59416     | 2YZQ   | 31.906                    | 1                | Cr Ka           | 2.2900        | 9 S                                   | 1.45                       | DOI: 10.2210/pdb2yzq/pdb          |
| 2007 | TTHA1012           | Q5SJJ6     | 2YZY   | 22.592                    | 1                | Cr Ka           | 2.2900        | 2 S                                   | 0.81                       | DOI: 10.2210/pdb2zyz/pdb          |
| 2007 | SCO7815            | Q9FBX0     | 2ZCX   | 25.366                    | 1                | Cr Ka           | 2.2909        | 4 S                                   | 1.08                       | DOI: 10.2210/pdb2zcx/pdb          |
| 2008 | AF1514             | O28758     | 3C0F   | 10.505                    | 1                | Cr Ka           | 2.2900        | 3 S                                   | 1.46                       | DOI: 10.1002/prot.22025           |
| 2008 | Npun_R1517         | B2IZS7     | 3E56   | 12.895                    | 1                | Cu Ka           | 1.5418        | 3 S                                   | 0.65                       | DOI: 10.1002/prot.22308           |
| 2008 | Antifreeze protein | A0ZT93     | 2ZIB   | 14.500                    | 1                | S8 BL44B2       | 1.7000        | 14 S                                  | 1.56                       | DOI: 10.1016/j.jmb.2008.07.042    |
| 2008 | Plbd2              | Q3TCN2     | 3FBX   | 63.123                    | 1                | BESSY 14.2      | 1.9000        | 22 S, 1 Na, 0.05 XE                   | 1.90                       | DOI: 10.1016/j.jmb.2009.03.077    |
| 2008 | All3740            | Q8YQS9     | 3DU1   | 27.740                    | 1                | Cu Ka           | 1.5418        | 6 S                                   | 0.62                       | DOI: 10.1016/j.jsb.2008.09.010    |
| 2008 | Takeout protein    | B5ABT1     | 3E8T   | 24.479                    | 1                | Cu Ka           | 1.5418        | 8 S                                   | 0.76                       | DOI: 10.1074/jbc.M807467200       |
| 2008 | Viscotoxin A1      | D0VWT3     | 3C8P   | 4.889                     | 2                | Cu Ka           | 1.5418        | 12 S                                  | 1.48                       | DOI: 10.1107/S0907444908022646    |
| 2008 | TTHA0621           | Q5SKM2     | 2ZGI   | 27.252                    | 4                | Cr Ka           | 2.2909        | 17 S                                  | 1.08                       | DOI: 10.1107/S1744309109050052    |
| 2008 | FeoA               | D0VVU5     | 3E19   | 7.972                     | 4                | APS 22ID        | 1.9000        | 20 S, 1 P                             | 1.82                       | DOI: 10.2210/pdb3e19/pdb          |
| 2008 | ATV_ORF131         | Q3V4Q3     | 3FAJ   | 16.390                    | 1                | SOLEIL Proxma 1 | 2.0000        | 3 S, 3 Cl                             | 2.05                       | DOI: 10.2210/pdb3faj/pdb          |
| 2009 | Lipase             | Q7LST4     | 3G7N   | 27.289                    | 2                | APS 22ID        | 1.9000        | 23 S                                  | 1.27                       | DOI: 10.1002/prot.22676           |
| 2009 | PRKAR1A            | P00514     | 3IM3   | 5.995                     | 1                | APS 23ID        | 1.9000        | 3 S                                   | 1.39                       | DOI: 10.1016/j.str.2009.12.012    |
| 2009 | GFP                | P42212     | 2WUR   | 26.854                    | 1                | Cu Ka           | 1.5418        | 6 S                                   | 0.63                       | DOI: 10.1021/ja1010652            |
| 2009 | PLA2-II            | Q9XG81     | 2WG7   | 13.965                    | 2                | ESRF BM14       | 1.7700        | 28 S, 2 Ca, 1 Na                      | 2.83                       | DOI: 10.1074/jbc.M109.008466      |
| 2009 | IYD protein        | Q9DCX8     | 3GB5   | 29.940                    | 1                | AOS 24-ID-C     | 1.6530        | 7 S, 2 P                              | 1.03                       | DOI: 10.1074/jbc.M109.013458      |
| 2009 | DegV               | P32436     | 3FYS   | 35.124                    | 1                | Cr Ka           | 2.2900        | 17 S                                  | 1.90                       | DOI: 10.1107/S0907444909007756    |
| 2009 | Protein P          | Q0GBY3     | 3L32   | 5.339                     | 2                | ESRF BM14       | 1.7700        | 6 S                                   | 1.28                       | DOI: 10.1128/JVI.02557-09         |
| 2009 | TPHE39A            |            | 2ZY6   | 10.273                    | 1                | PF AR-NW12A     | 1.7000        | 38 P, 7 Ca, 1 Mg, 1 Cl                | 6.14                       | DOI: 10.1261/ma.1614709           |
| 2009 | NGAL               | P80188     | 3HFW   | 39.506                    | 1                | ESRF ID29       | 1.8500        | 15 S, 2 P, 1 Mg, 1 K, 1 Cl            | 2.49                       | DOI: 10.2210/pdb3hfw/pdb          |
| 2009 | BH3703             | Q9K6M5     | 3I0T   | 21.873                    | 2                | APS 31ID        | 2.2700        | 11 S                                  | 1.32                       | DOI: 10.2210/pdb3i0t/pdb          |
| 2010 | HP0721             | O25423     | 2XRH   | 11.490                    | 1                | ESRF ID29       | 1.9100        | 7 S                                   | 1.53                       | DOI: 10.1002/prot.22988           |
| 2010 | GluRS              | O26157     | 3All   | 63.089                    | 1                | Cr Ka           | 2.2900        | 16 S, 1 Ca, 1 Zn                      | 2.54                       | DOI: 10.1093/nar/gkq605           |
| 2010 | AF1382             | O28889     | 3O3K   | 11.144                    | 1                | APS 22ID        | 1.9000        | 4 S                                   | 1.17                       | DOI: 10.1107/S0907444912026212    |
| 2010 | PA1645             | Q9I380     | 2XU8   | 13.102                    | 3                | DIAMOND I03     | 1.6000        | 17 S                                  | 0.94                       | DOI: 10.1107/S1744309112044739    |
| 2010 | TDRD3              | Q9H7E2     | 3PMT   | 6.876                     | 1                | Cu Ka           | 1.5418        | 2 S                                   | 0.72                       | DOI: 10.1371/journal.pone.0030375 |

| Year | Molecule     | Uniprot ID | PDB ID | <sup>1</sup> MWT (SEQRES) | <sup>2</sup> NCS | Source          | $\lambda$ (Å) | <sup>3</sup> Anomalous Scatters (ASU) | <sup>4</sup> Bijvoet Ratio | <sup>5</sup> Reference                |
|------|--------------|------------|--------|---------------------------|------------------|-----------------|---------------|---------------------------------------|----------------------------|---------------------------------------|
| 2010 | TorS/TorT    | Q87ID1     | 3O1I   | 31.666                    | 4                | NSLS X4A        | 1.7400        | 28 S                                  | 0.75                       | doi:10.1107/S0907444913001479         |
| 2011 | TNFRSF21     | O75509     | 3U3Q   | 34.157                    | 1                | PF BL17A        | 2.0000        | 21 S                                  | 1.67                       | DOI 10.1107/S0907444912004490         |
| 2011 | hPAR17       | Q9Y237     | 3UI5   | 11.143                    | 1                | Cu Ka           | 1.5418        | 15 S                                  | 1.55                       | DOI: 10.1021/ja2086195                |
| 2011 | Lectin SML2  | P81860     | 2YIL   | 15.077                    | 6                | DESY X12        | 2.0000        | 105 S, 7 Cl                           | 3.04                       | DOI: 10.1107/S0907444911037796        |
| 2011 | TNFRSF21     | O75509     | 3U3V   | 34.157                    | 1                | PF BL1A         | 2.7000        | 21 S                                  | 2.82                       | DOI: 10.1107/S0907444912004490        |
| 2011 | dntR protein | Q7WT50     | 2Y7P   | 24.813                    | 1                | ESRF ID23       | 1.8200        | 12 S                                  | 1.25                       | DOI: 10.1111/j.1365-2958.2011.07673.x |
| 2011 | RYR-1        | P11716     | 3RQR   | 26.433                    | 1                | Cr Ka           | 2.2909        | 4 S                                   | 1.06                       | DOI: 10.1111/j.1742-4658.2012.08755.x |
| 2011 | A654L        | O41136     | 3QB8   | 22.397                    | 2                | NSLS X6A        | 1.7000        | 21 S, 3 P                             | 1.41                       | DOI: 10.2210/pdb3q88/pdb              |
| 2011 | Netrin-G2    | Q96CW9     | 3TBD   | 38.923                    | 1                | NSLS X4A        | 1.7400        | 26 S, 1P, 1 Ca                        | 1.87                       | doi:10.1107/S0907444913001479         |
| 2011 | cysZ         | Q5QUJ8     | 3TX3   | 28.942                    | 2                | NSLS X4A        | 1.7400        | 41 S, 4 Cl                            | 1.66                       | doi:10.1107/S0907444913001479         |
| 2011 | RPA2292      | Q6N7G5     | 3VA9   | 18.727                    | 1                | NSLS X4A        | 1.7400        | 3 S, 1 Cl                             | 0.92                       | doi:10.1107/S0907444913001479         |
| 2012 | cxl34b.11    | F1Q6N2     | 4HCS   | 9.299                     | 1                | Cr Ka           | 2.2900        | 7 S                                   | 2.36                       | DOI: 10.1002/prot.24380               |
| 2012 | Saposin-A    | P07602     | 4DDJ   | 9.054                     | 1                | Cr Ka           | 2.2900        | 9 S                                   | 2.72                       | DOI: 10.1073/pnas.1115743109          |
| 2012 | cofA         | Q59393     | 3VOR   | 18.886                    | 1                | SP8 BL38B1      | 1.5000        | 5 S                                   | 0.67                       | DOI: 10.1107/S0907444912034464        |
| 2012 | Glutaredoxin | Q9NLB2     | 4HJM   | 12.418                    | 1                | Cu Ka           | 1.5418        | 6 S                                   | 0.93                       | DOI: 10.1107/S1399004713025285        |
| 2012 | S100-A2      | P29034     | 4DUQ   | 11.068                    | 2                | SLS X06SA       | 0.9000        | 6 S, 4 Ca                             | 0.73                       | DOI: 10.1111/j.1742-4658.2012.08556.x |
| 2013 | UmAbf62A     | Q4P6F4     | 4N1I   | 37.014                    | 1                | Cu Ka           | 1.5418        | 8 S, 1 Ca                             | 1.13                       | DOI 10.1074/jbc.M113.528133           |
| 2013 | FAM3B        | Q9D309     | 2YOP   | 22.127                    | 3                | ESRF ID29       | 2.0000        | 24 S                                  | 1.28                       | DOI: 10.1016/j.str.2012.12.009        |
| 2013 | NTPDase 1    | Q5ZUA2     | 4BRM   | 41.844                    | 2                | BESSY BL14.2    | 1.9000        | 32 S, 2 Cl                            | 1.59                       | DOI: 10.1016/j.str.2013.05.016        |
| 2013 | MGST1-L1     | O14684     | 4BPM   | 20.328                    | 1                | SLS X06DA       | 2.0660        | 9 S, 2 Cl                             | 2.34                       | DOI: 10.1021/cg500157x                |
| 2013 | CNOT1        | P26651     | 4J8S   | 25.739                    | 1                | Cu Ka           | 1.5418        | 9 S                                   | 0.79                       | DOI: 10.1038/nsmb.2572                |
| 2013 | Ld lectin    | A7UNK4     | 4NDS   | 10.282                    | 2                | ESRF BM14       | 1.6980        | 12 S, 3 Na                            | 1.35                       | DOI: 10.1093/glycob/cwu136            |
| 2013 | Carwin       | U5HK42     | 4JP6   | 13.665                    | 1                | Cu Ka           | 1.5418        | 6 S                                   | 0.89                       | DOI: 10.1107/S0907444913018015        |
| 2013 | PilO2Bp      | Q63JW5     | 4BYZ   | 22.167                    | 1                | ESRF BL14       | 1.7710        | 4 S, 1 P, 5 K                         | 2.55                       | DOI: 10.1371/journal.pone.0094981     |
| 2013 | Milk protein | Q6SVB6     | 4NYR   | 18.725                    | 1                | PF BL1A         | 2.7000        | 5 S                                   | 1.86                       | DOI: 10.2210/pdb4nyr/pdb              |
| 2013 | DnaK         | P0A6Y8     | 4JN4   | 65.813                    | 2                | NSLS X4B/C      | 1.7400        | 43 S, 6 P, 2 Mg                       | 1.23                       | doi:10.1107/S0907444913001479         |
| 2014 | CopN         | Q9Z8L4     | 4P3Z   | 46.532                    | 1                | SOLEIL Proxma 1 | 1.9040        | 12 S                                  | 0.99                       | DOI: 10.1074/jbc.M114.568436          |
| 2014 | TM0633       | Q9WZA1     | 4QDN   | 15.826                    | 1                | ESRF ID23-EH1   | 2.0600        | 8 S, 1                                | 2.05                       | DOI: 10.1093/glycob/cwu113            |
| 2014 | Z DNA duplex |            | 4OCB   | 3.727                     | 1                | APS 22ID        | 1.5400        | 11 P                                  | 1.75                       | DOI: 10.1107/S1399004714004684        |
| 2014 | YetJ         | O31539     | 4TKQ   | 24.100                    | 1                | NSLS X4A        | 2.0700        | 8 S, 1 Ca, 3 Cl                       | 3.27                       | DOI: 10.1107/S1399004714013376        |
| 2014 | ThiT         | S5L6I0     | 4TKR   | 24.052                    | 2                | NSLS X4A        | 2.0737        | 18 S, 4 P                             | 1.90                       | DOI: 10.1107/S1399004714013376        |
| 2014 | EGFRK        | P00533     | 4TKS   | 37.660                    | 1                | NSLS X4A        | 2.0710        | 17 S                                  | 2.42                       | DOI: 10.1107/S1399004714013376        |
| 2014 | HCV nE1      | H9XGD6     | 4UOI   | 9.606                     | 6                | DIAMOND I04     | 1.7712        | 24 S                                  | 1.10                       | DOI: 10.1107/S139900471401339X        |
| 2014 | NS1          | Q5SBG8     | 4TPL   | 42.556                    | 2                | APS 23ID        | 1.7462        | 35 S                                  | 1.07                       | DOI: 10.1107/S1399004714017556        |
| 2014 | AggA         | G5TBZ9     | 4PH8   | 16.746                    | 2                | ESRF BM14       | 1.7500        | 6 S                                   | 0.71                       | DOI: 10.1371/journal.ppat.1004404     |

| Year | Molecule                     | Uniprot ID                              | PDB ID | <sup>1</sup> MWT (SEQRES) | <sup>2</sup> NCS | Source          | $\lambda$ (Å) | <sup>3</sup> Anomalous Scatters (ASU) | <sup>4</sup> Bijvoet Ratio | <sup>5</sup> Reference         |
|------|------------------------------|-----------------------------------------|--------|---------------------------|------------------|-----------------|---------------|---------------------------------------|----------------------------|--------------------------------|
| 2014 | Muskelin                     | Q99PV3                                  | 4OYU   | 23.146                    | 2                | BESSY 14.1      | 1.9000        | 18 S                                  | 1.22                       | DOI:10.1016/j.str.2014.11.016  |
| 2014 | PF0904                       | Q8U2D2                                  | 4PGO   | 12.677                    | 1                | SLS X06SA       | 2.0660        | 3 S, 1 Cl                             | 1.85                       | DOI:10.1038/nmeth.3211         |
| 2014 | PF0907                       | Q8U2D5                                  | 4PII   | 29.252                    | 1                | SLS X06SA       | 2.0660        | 8 S, 12 Cl                            | 2.89                       | DOI:10.1038/nmeth.3211         |
| 2014 | JEV protease                 | O90417                                  | 4R8T   | 17.617                    | 1                | SLS X06SA       | 2.0660        | 5 S                                   | 1.20                       | DOI:10.1038/nmeth.3211         |
| 2014 | Pol IV - DNA                 | Q47155                                  | 4R8U   | 48.417                    | 2                | SLS X06SA       | 2.0660        | 28 S, 75 P, 2 Ca                      | 3.50                       | DOI:10.1038/nmeth.3211         |
| 2014 | TTC1385                      | Q72HU9                                  | 4TN8   | 12.461                    | 1                | SLS X06SA       | 2.0660        | 5 S, 6 Cl                             | 3.28                       | DOI:10.1038/nmeth.3211         |
| 2014 | ACD11                        | O64587                                  | 4TNO   | 9.978                     | 1                | SLS X06SA       | 2.0660        | 3 S, 2 Cl                             | 2.43                       | DOI:10.1038/nmeth.3211         |
| 2014 | mPGES1                       | B5MCC3                                  | 4WAB   | 20.328                    | 1                | SLS X06SA       | 2.0660        | 9 S, 2 Cl                             | 2.53                       | DOI:10.1038/nmeth.3211         |
| 2014 | CENP-M                       | Q9NSP4                                  | 4WAU   | 19.220                    | 2                | SLS X06SA       | 2.0660        | 14 S                                  | 1.36                       | DOI:10.1038/nmeth.3211         |
| 2014 | PF1771                       | Q8U046                                  | 4WBX   | 44.038                    | 1                | SLS X06SA       | 2.0660        | 13 S                                  | 1.23                       | DOI:10.1038/nmeth.3211         |
| 2014 | TAF8/TAF10 Complex           | Q12962/<br>Q7Z7C8                       | 4WV4   | 22.000                    | 1                | SOLEIL Proxma 1 | 1.9075        | 8 S, 1 Cl                             | 1.70                       | DOI:10.1038/ncomms7011         |
| 2014 | Tubulin-Stathmin-TTL Complex | P81947/<br>Q6B856/<br>P63043/<br>E1BQ43 | 4WBN   | 261.249                   | 1                | SLS X06SA       | 2.0660        | 118 S, 13 P, 3 Ca, 2 Cl               | 2.69                       | DOI:10.1038/nmeth.3221         |
| 2015 | Philin                       | Q8EII5                                  | 4US7   | 9.843                     | 2                | BESSY 14.1      | 1.77          | 2 S, 1 Na                             | 0.99                       | DOI: 10.1107/S1399004715003272 |

<sup>1</sup>Molecular weight for the molecule as reflected by the PDB SEQRES records for the PDB entry. The EXePASy - ProtParam tool was used to calculate the molecular weight based on the PDB fasta sequence for the chain.

<sup>2</sup>The number of molecules in the crystallographic asymmetric unit as reflected in the PDB entry.

<sup>3</sup>The number and type of anomalous scatterer found in the PDB entry as reflected in the ATOMS and FORMUL records.

<sup>4</sup>The Bijvoet ratio  $[(\langle |F| \rangle) / (\langle F \rangle)]^{-1}$  for the PDB entry (Hendrickson, W. A. & Teeter, M. M. (1981). *Nature* **290**, 107-113). The values were calculated using James Holton's xtalsize server <http://bl831.als.lbl.gov/xtalsize.html>.

<sup>5</sup>The Digital Object Identifier (DOI) of the paper or PDB entry describing the work.
